# Supplementary material
Source: publisher figshare collection journal article supplement (https://frontiersin.figshare.com/ndownloader/files/15616226)
Supplement: Supplementary file [file 15616226]

**Table S1. Groundwater sample volumes and recoveries of DNA, RNA and protein**

| Well      | Volume Filtered (L) | Number of Hole Punches for Nucleic Acids Extraction | Volume Filtered Through Hole Punches (L) | Number of Hole Punches for Nucleic Acids Extraction | DNA recovered (ng) |     | RNA recovered (µg) |     | Protein recovered (µg) |     |
|-----------|---------------------|-----------------------------------------------------|------------------------------------------|-----------------------------------------------------|--------------------|-----|--------------------|-----|------------------------|-----|
|           |                     |                                                     |                                          |                                                     | F                  | PF  | F                  | PF  | F                      | PF  |
| PM2A2     | 9.5                 | 5                                                   | 0.125                                    | 5                                                   | 102                | 38  | 2.6                | 2.1 | 30                     | n/a |
| EW1       | 12                  | 5                                                   | 0.158                                    | 5                                                   | 46                 | 13  | 1.9                | 1.5 | 46                     | n/a |
| O-BH09-A1 | 11.25               | 5                                                   | 0.148                                    | 5                                                   | 2.8                | 2.5 | bd                 | bd  | 60                     | n/a |
| O-BH10-A1 | 8.25                | 5                                                   | 0.109                                    | 5                                                   | 2.4                | 3.4 | bd                 | bd  | 60                     | n/a |

\*bd means that RNA was below detection in extractant fluid.

n/a indicates not extracted.
